# Supplementary material
Source: publisher figshare collection journal article supplement (https://frontiersin.figshare.com/ndownloader/files/34144587)
Supplement: Supplementary file 1 [file 34144587]

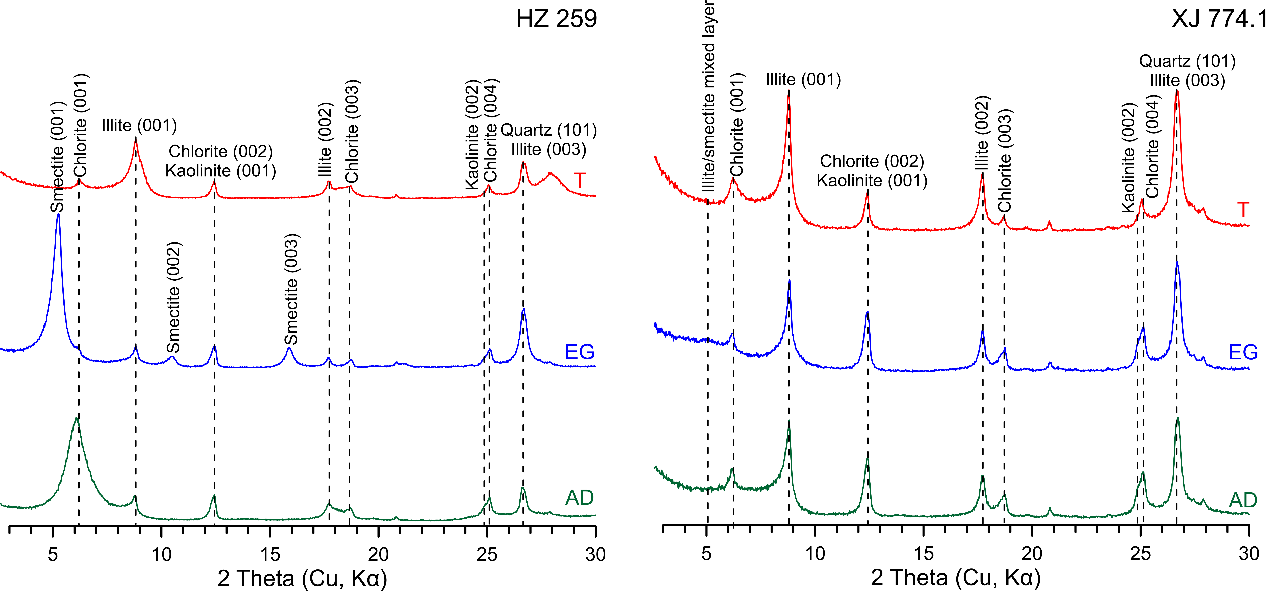


**Supplementary Figure 1.** XRD patterns of representative clay samples. Illite-smectite mixed layer (I/S), smectite, illite, chlorite and kaolinite are the main clay minerals in the section. AD, EG, T and Hyd represent aid-dried, glycol-saturated, heated and hydrazine-saturated states, respectively.


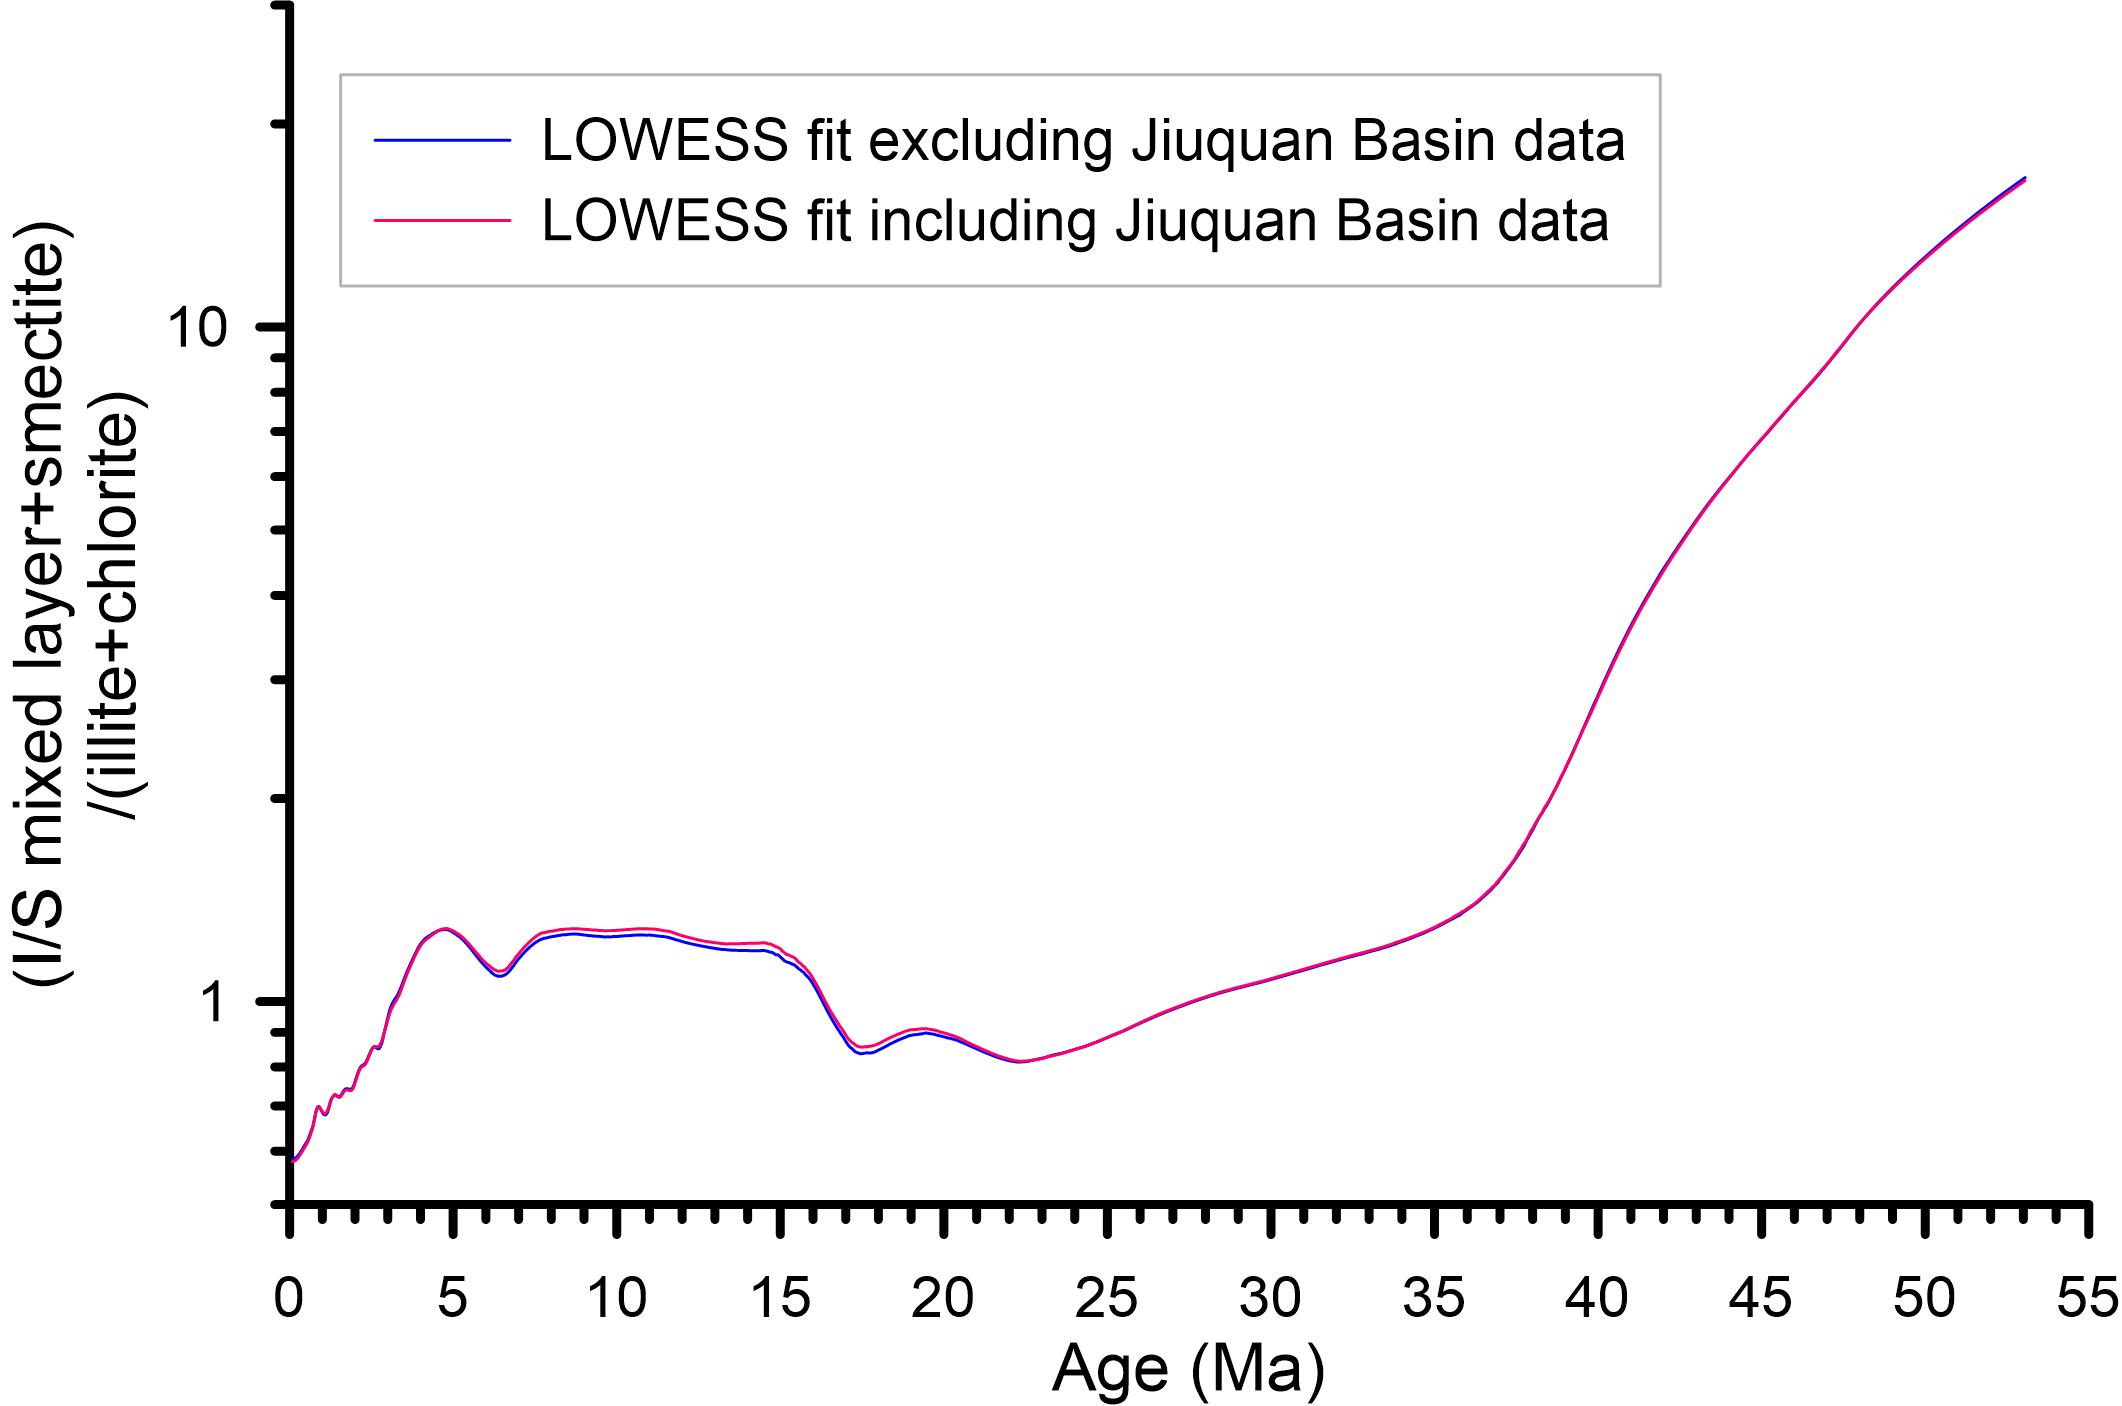


**Supplementary Figure 2.** Locally-weighted scatterplot smoothing (LOWESS, smoothing factor is 0.1) of the compiled data with and excluding the Jiuquan Basin clay mineral data.


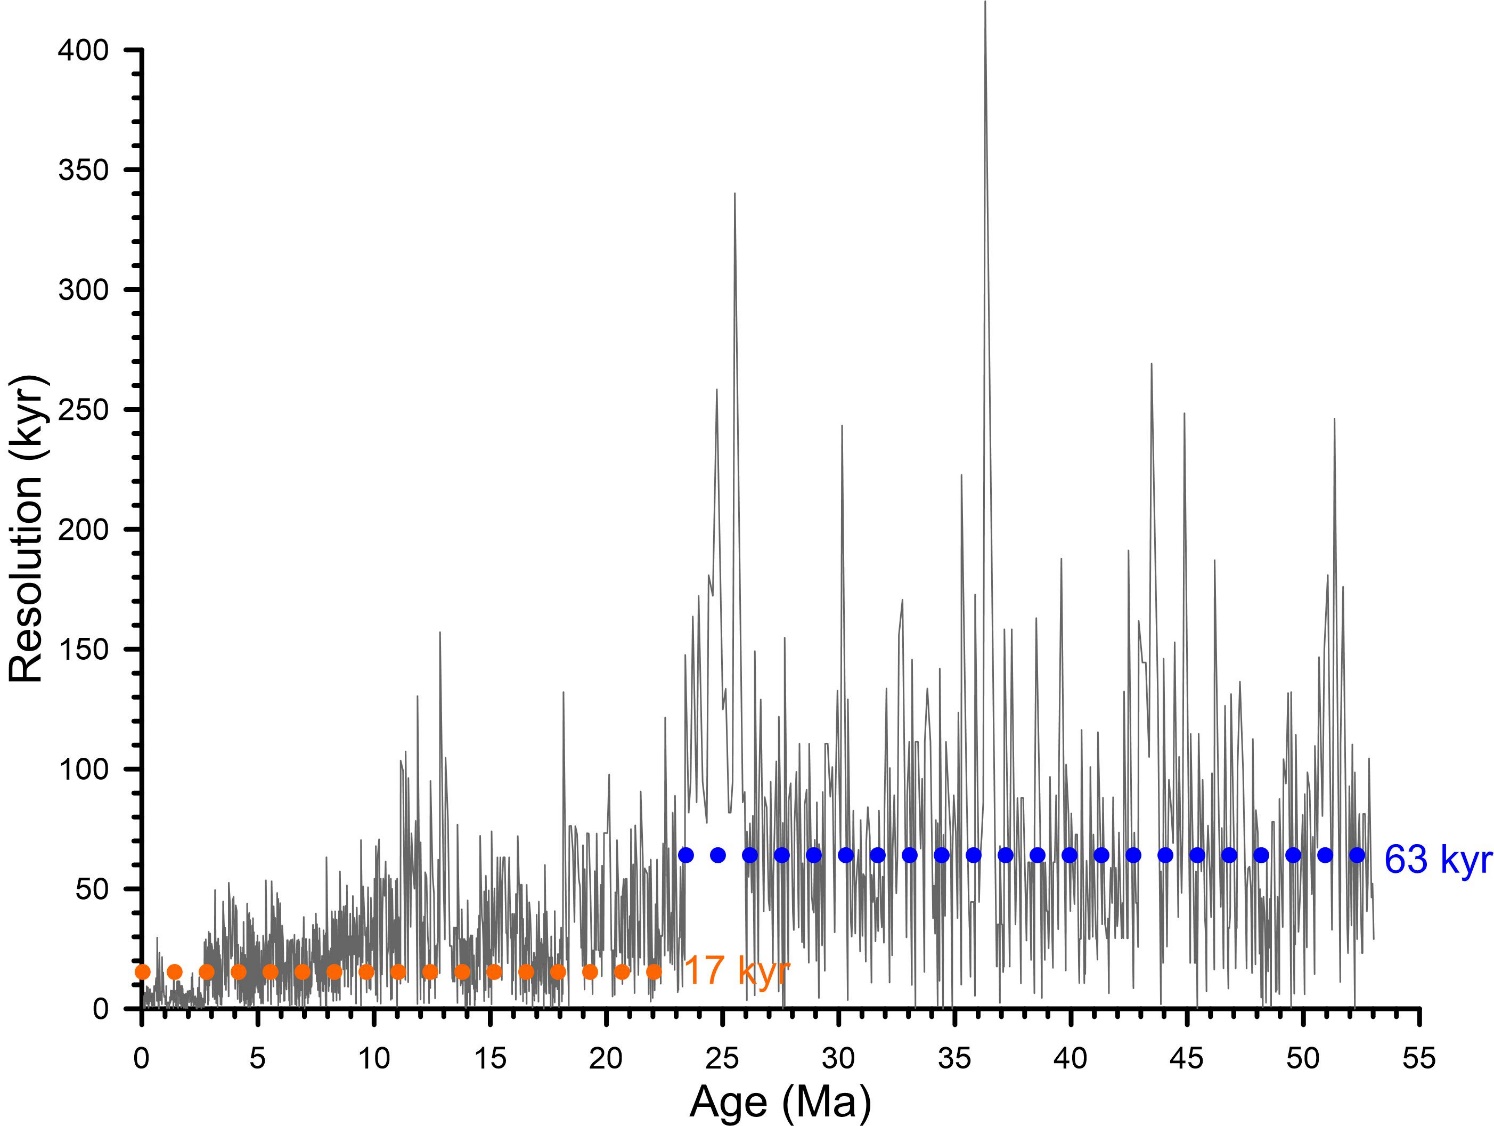


**Supplementary Figure 3.** Temporal resolution of the compiled (I/S mixed layer+smectite)/(illite+chlorite) records. Dotted line blue and red lines indicate the average of the data values before and after 23 Ma, respectively.
